# Supplementary material for: Age-at-injury effects of microglial activation following traumatic brain injury: implications for treatment strategies
Source: PubMed Central journal article supplement — Neural Regen Res. 2017 May;12(5):741–2. doi: 10.4103/1673-5374.206639 (PMC5461606; doi:10.4103/1673-5374.206639), 2017-05
Supplement: NRR-12-741_Suppl1.pdf [file NRR-12-741_Suppl1.pdf]

**Additional file:**

**Open peer review report 1 on “Age-at-injury effects of microglial activation following traumatic brain injury: implications for treatment strategies”.**

**Reviewer:** Jose A. Garcia-Sanz, Centro de Investigaciones Biologicas, Spain

**Comments to the author:**

The manuscript is sound and relevant for the field

**Open peer review report 2 on “Age-at-injury effects of microglial activation following traumatic brain injury: implications for treatment strategies”:**

**Reviewer:** Ozgur Boyraz, Gulhane Military Medical Academy, Turkey

**Comments to the author:**

The paper is technically sound about neuroprotection and neurorepair, and the data support the conclusions. The conclusions have drawn appropriately implications for treatment strategies in traumatic brain injury.
